# Supplementary material for: A theoretical study on ionic liquid endohedral C540 fullerene
Source: Royal Society of Chemistry journal article supplement (doi:10.1039/c4ra07239a), 2014-01-01
Supplement: c4ra07239a1.pdf [file c4ra07239a1.pdf]

## **A theoretical study on ionic liquid endohedral C540 fullerene**

Gregorio J. García,<sup>a</sup> Mert Atilhan,<sup>b</sup> and S. Aparicio<sup>\*a</sup>

<sup>a</sup>Department of Chemistry, University of Burgos, 09001 Burgos, Spain

<sup>b</sup>Department of Chemical Engineering, Qatar University, P.O. Box 2713, Doha, Qatar

\*Corresponding author: [sapar@ubu.es](mailto:sapar@ubu.es)

### **Electronic supplementary information**

**Table S1** NBO charge transfer energies,  $\Delta E$  (NBO), AIM parameters (electron density,  $\rho$ , laplacian of electron density,  $\nabla^2\rho$ , and ellipticity,  $\varepsilon$ ) and distance,  $d$ , between donor and acceptor for interionic interactions. All values calculated for the cluster formed by 6\_CH\_BE confined inside C540. The most relevant interactions are reported in bold. Atom labelling as in Figure 13

| Donor                 | NBO                      |                                              | AIM           |                       |                      |                |
|-----------------------|--------------------------|----------------------------------------------|---------------|-----------------------|----------------------|----------------|
|                       | Acceptor                 | $\Delta E$ (NBO) /<br>kcal mol <sup>-1</sup> | $\rho$ /a. u. | $\nabla^2\rho$ /a. u. | $\varepsilon$ /a. u. | $d/\text{\AA}$ |
| LP O162               | BD* C 57 - H 61          | 5.22                                         | 0.0242        | 0.0418                | 0.0175               | 2.091          |
| BD C161 - O162        | BD* C 57 - H 61          | 0.67                                         |               |                       |                      |                |
| LP O162               | BD* C 45 - H 49          | 6.60                                         | 0.0217        | 0.0392                | 0.0042               | 2.124          |
| LP O162               | BD* C 46 - H 47          | 4.05                                         | 0.0171        | 0.0377                | 0.0759               | 2.193          |
| <b>LP O190</b>        | <b>BD* O 62 - H 63</b>   | <b>10.91</b>                                 | <b>0.0230</b> | <b>0.0410</b>         | <b>0.0773</b>        | <b>2.019</b>   |
| LP O190               | BD* C 23 - H 32          | 3.34                                         | 0.0135        | 0.0257                | 0.1697               | 2.348          |
| LP O190               | BD* C 36 - H 40          | 1.59                                         | 0.0099        | 0.0243                | 0.2097               | 2.512          |
| LP O204               | BD* C 65 - H 73          | 5.11                                         | 0.0196        | 0.0330                | 0.0222               | 2.158          |
| LP O204               | BD* C 78 - H 81          | 1.87                                         | 0.0096        | 0.0172                | 0.0872               | 2.500          |
| <b>LP O 204</b>       | <b>BD* O 125 - H 126</b> | <b>19.05</b>                                 | <b>0.0350</b> | <b>0.0586</b>         | <b>0.0270</b>        | <b>1.848</b>   |
| LP O 205              | BD* C 120 - H 123        | 4.81                                         | 0.0268        | 0.0459                | 0.0526               | 2.039          |
| BD C189 - O191        | BD* C 24 - H 27          | 1.18                                         | 0.0216        | 0.0363                | 0.0259               | 2.095          |
| LP O191               |                          | 7.71                                         |               |                       |                      |                |
| BD C189 - O191        | BD* C 44 - H 52          | 0.98                                         | 0.0098        | 0.0316                | 0.0664               | 2.491          |
| LP O191               |                          | 0.81                                         |               |                       |                      |                |
| BD C169 - C170        | BD* C 44 - H 51          | 0.87                                         | 0.0111        | 0.0211                | 0.8147               | 2.532          |
| BD C170 - H179        |                          | 1.15                                         |               |                       |                      |                |
| <b>BD C175 - O176</b> | <b>BD* C 99 - H103</b>   | <b>3.10</b>                                  | <b>0.0351</b> | <b>0.0628</b>         | <b>0.0507</b>        | <b>1.875</b>   |
| <b>LP O176</b>        |                          | <b>8.75</b>                                  |               |                       |                      |                |
| C175 - O176           | BD* C109 - H110          | 0.73                                         | 0.0141        | 0.0257                | 0.0604               | 2.288          |
| LP O176               |                          | 1.83                                         |               |                       |                      |                |
| LP O176               | BD* C 87 - H 91          | 1.92                                         | 0.0117        | 0.0208                | 0.1822               | 2.402          |
| LP O176               | BD* C107 - H115          | 2.03                                         | 0.0112        | 0.0252                | 0.0717               | 2.432          |
| LP O177               | BD* C 65 - H 72          | 1.38                                         | 0.0172        | 0.0363                | 0.0834               | 2.228          |
| LP O177               | BD* O104 - H105          | 3.77                                         | 0.0147        | 0.0267                | 0.0895               | 2.247          |
| LP O177               | BD* C119 - H121          | 1.24                                         | 0.0099        | 0.0262                | 0.0358               | 2.487          |
| BD C156 - C157        | BD* C 57 - H 61          | 0.36                                         | 0.0157        | 0.0302                | 0.9701               | 2.305          |
| BD C157 - C160        |                          | 0.21                                         |               |                       |                      |                |
| BD C157 - H166        |                          | 0.67                                         |               |                       |                      |                |
| BD C161 - O163        | BD* C 88 - H 97          | 0.24                                         | 0.0120        | 0.0213                | 0.0542               | 2.390          |
| LP O163               |                          | 2.45                                         |               |                       |                      |                |
| LP O163               | BD* C 86 - H 94          | 1.27                                         | 0.0082        | 0.0253                | 0.0759               | 2.520          |
| BD C144 - C146        | BD* C 2 - H 10           | 1.44                                         | 0.0158        | 0.0294                | 0.4044               | 2.299          |
| BD C147 - O148        | BD* C 4 - H 12           | 1.13                                         | 0.0120        | 0.0254                | 0.3916               | 2.532          |
| LP O148               | BD* C 3 - H 7            | 3.03                                         | 0.0160        | 0.0263                | 0.0404               | 2.378          |
| LP O149               | BD* C 23 - H 31          | 6.33                                         | 0.0259        | 0.0451                | 0.0243               | 2.036          |
| LP O149               | BD* C 25 - H 26          | 2.88                                         | 0.0162        | 0.0288                | 0.1139               | 2.281          |
| LP O149               | BD* C 36 - H 39          | 5.50                                         | 0.0214        | 0.0392                | 0.0918               | 2.085          |
| LP O134               | BD* O 20 - H 21          | 7.64                                         | 0.0198        | 0.0289                | 0.0628               | 2.176          |
| LP O134               | BD* C 87 - H 92          | 4.51                                         | 0.0179        | 0.0244                | 0.2214               | 2.336          |
| LP O134               | BD* C 99 - H102          | 3.84                                         | 0.0157        | 0.0341                | 0.1036               | 2.171          |
| BD C133 - O135        | BD* C107 - H114          | 0.53                                         | 0.0237        | 0.0407                | 0.0842               | 2.082          |
| LP O135               |                          | 6.71                                         |               |                       |                      |                |
| LP O135               | BD* C 87 - H 92          | 1.91                                         | 0.0134        | 0.0235                | 0.3388               | 2.349          |
| LP O135               | BD* C109 - H117          | 2.62                                         | 0.0128        | 0.0240                | 0.1562               | 2.297          |
